# Supplementary material
Source: PubMed Central journal article supplement (PMC2981204)
Supplement: supp_192_23_6271__1.pdf [file supp_192_23_6271__1.pdf]

**Supplemental Material for:**  
**“MzrA-EnvZ Interactions in the Periplasm Influence the EnvZ/OmpR Two-Component  
 Regulon”**

**Table S1.** Bacterial strains and plasmids used in this study.

| Strain or plasmid | Characteristics                                                                                                                                                        | Reference or Source <sup>a</sup> |
|-------------------|------------------------------------------------------------------------------------------------------------------------------------------------------------------------|----------------------------------|
| <b>Strains</b>    |                                                                                                                                                                        |                                  |
| MC4100            | F <sup>-</sup> <i>araD139</i> $\Delta$ ( <i>argF-lac</i> ) <i>U139</i> <i>rspL150</i> <i>relA1</i> <i>flbB5301</i> <i>ptsF25</i> <i>deoC1</i> <i>thi-1</i> <i>rbsR</i> | (7)                              |
| RAM1292           | MC4100 $\Delta$ <i>ara714</i>                                                                                                                                          | (37)                             |
| BTH101            | F <sup>-</sup> <i>cya99</i> <i>araD139</i> <i>galE15</i> <i>galK16</i> <i>rpsL1</i> (Str <sup>r</sup> ) <i>hsdR2</i> <i>mcrA1</i> <i>mcrB1</i>                         | Euromedex                        |
| RAM483            | RAM474 <i>ompF315</i> ; Dex <sup>+</sup> $\Delta$ <i>lamB106</i>                                                                                                       | (24)                             |
| RAM1503           | RAM1292 / pBAD24 (Amp <sup>r</sup> )                                                                                                                                   | (13)                             |
| RAM1505           | RAM1292 / pBAD24- <i>mzrA</i> (FLAG)                                                                                                                                   | (13)                             |
| RAM1508           | RAM1292 $\Delta$ <i>mzrA</i> :: <i>scar</i>                                                                                                                            | (13)                             |
| RAM1543           | BTH101 / pKT25 (Kan <sup>r</sup> ) pUT18C (Amp <sup>r</sup> )                                                                                                          | (13)                             |
| RAM1544           | BTH101 / pKT25- <i>mzrA</i> and pUT18C                                                                                                                                 | (13)                             |
| RAM1545           | BTH101 / pKT25- <i>mzrA</i> and pUT18C- <i>envZ</i>                                                                                                                    | (13)                             |
| RAM1563           | RAM1292 / pBAD24- <i>mzrA</i> :: <i>phoA</i>                                                                                                                           | (13)                             |
| RAM1774           | RAM1292 / pBAD24- <i>mzrA</i> [ $\Delta$ 105-127](FLAG)                                                                                                                | This Study                       |
| RAM1775           | RAM1292 / pBAD24- <i>mzrA</i> [ $\Delta$ 73-127](FLAG)                                                                                                                 | This Study                       |
| RAM1776           | RAM1292 / pBAD24- <i>mzrA</i> [ $\Delta$ 2-31](FLAG)                                                                                                                   | This Study                       |
| RAM1777           | RAM1292 / pBAD24- <i>mzrA</i> [ $\Delta$ 13-28](FLAG)                                                                                                                  | This Study                       |
| RAM1778           | RAM1292 / pBAD24- <i>mzrA</i> [ $\Delta$ 1-5](FLAG)                                                                                                                    | This Study                       |
| RAM1779           | RAM1292 / pBAD24- <i>mzrA</i> [TM]:: <i>mzrA</i> [ $\Delta$ TM](FLAG)                                                                                                  | This Study                       |
| RAM1780           | RAM1292 / pBAD24- <i>narX</i> [TM]:: <i>mzrA</i> [ $\Delta$ TM](FLAG)                                                                                                  | This Study                       |
| RAM1781           | RAM1292 / pBAD24- <i>phoA</i> [SS]:: <i>mzrA</i> [ $\Delta$ TM](FLAG)                                                                                                  | This Study                       |
| RAM1782           | RAM1292 / pBAD24- <i>ompF</i> [SS]:: <i>mzrA</i> [ $\Delta$ TM](FLAG)                                                                                                  | This Study                       |
| RAM1783           | RAM1292 / pBAD24- <i>ompF</i> [SS]:: <i>mzrA</i> [ $\Delta$ TM], [ $\Delta$ 105-127](FLAG)                                                                             | This Study                       |
| RAM1784           | RAM1292 / pBAD24- <i>mzrA</i> [TM]                                                                                                                                     | This Study                       |
| RAM1785           | RAM1292 / pBAD24- <i>narX</i> [TM]                                                                                                                                     | This Study                       |
| RAM1786           | RAM1292 / pBAD24- <i>phoA</i> [SS]                                                                                                                                     | This Study                       |
| RAM1787           | RAM1292 / pBAD24- <i>ompF</i> [SS]                                                                                                                                     | This Study                       |
| RAM1788           | RAM1292 / pBAD24- <i>mzrA</i> [ $\Delta$ TM](FLAG)                                                                                                                     | This Study                       |
| RAM1789           | RAM1292 / pBAD24- <i>mzrA</i> [D51A](FLAG)                                                                                                                             | This Study                       |
| RAM1790           | RAM1292 / pBAD24- <i>mzrA</i> [K67A](FLAG)                                                                                                                             | This Study                       |
| RAM1791           | RAM1292 / pBAD24- <i>mzrA</i> [D74A](FLAG)                                                                                                                             | This Study                       |
| RAM1792           | RAM1292 / pBAD24- <i>mzrA</i> [Q85A](FLAG)                                                                                                                             | This Study                       |
| RAM1793           | RAM1508 / pBAD24- <i>mzrA</i> :: <i>phoA</i>                                                                                                                           | This Study                       |
| RAM1794           | RAM1508 / pBAD24- <i>mzrA</i> [D51A]:: <i>phoA</i>                                                                                                                     | This Study                       |
| RAM1795           | RAM1508 / pBAD24- <i>mzrA</i> [K67A]:: <i>phoA</i>                                                                                                                     | This Study                       |
| RAM1796           | RAM1508 / pBAD24- <i>mzrA</i> [D74A]:: <i>phoA</i>                                                                                                                     | This Study                       |
| RAM1797           | RAM1508 / pBAD24- <i>mzrA</i> [Q85A]:: <i>phoA</i>                                                                                                                     | This Study                       |
| RAM1798           | RAM1508 / pBAD24- <i>mzrA</i> [I78F]:: <i>phoA</i>                                                                                                                     | This Study                       |
| RAM1799           | RAM1508 / pBAD24- <i>mzrA</i> [D51A,I78F]:: <i>phoA</i>                                                                                                                | This Study                       |
| RAM1800           | RAM483 <i>araCBAD</i> :: <i>kan</i> <sup>r</sup>                                                                                                                       | This Study                       |
| RAM1801           | RAM1800 / pBAD24- <i>mzrA</i> :: <i>phoA</i>                                                                                                                           | This Study                       |
| RAM1802           | RAM1800 / pBAD24- <i>mzrA</i> [D51A]:: <i>phoA</i>                                                                                                                     | This Study                       |
| RAM1803           | RAM1800 / pBAD24- <i>mzrA</i> [I78F]:: <i>phoA</i>                                                                                                                     | This Study                       |
| RAM1804           | RAM1800 / pBAD24- <i>mzrA</i> [D51A,I78F]:: <i>phoA</i>                                                                                                                | This Study                       |
| RAM1805           | BTH101 / pKT25 <i>mzrA</i> [D51A] and pUT18C                                                                                                                           | This Study                       |

|                                                                               |                                                                                                                       |                     |
|-------------------------------------------------------------------------------|-----------------------------------------------------------------------------------------------------------------------|---------------------|
| RAM1806                                                                       | BTH101 / pKT25- <i>mzrA</i> [I78F] and pUT18C                                                                         | This Study          |
| RAM1807                                                                       | BTH101 / pKT25- <i>mzrA</i> [D51A,I78F] and pUT18C                                                                    | This Study          |
| RAM1808                                                                       | BTH101 / pKT25- <i>mzrA</i> and pUT18C <i>mzrA</i>                                                                    | This Study          |
| RAM1809                                                                       | BTH101 / pKT25- <i>mzrA</i> [D51A] and pUT18C- <i>mzrA</i>                                                            | This Study          |
| RAM1810                                                                       | BTH101 / pKT25- <i>mzrA</i> [I78F] and pUT18C- <i>mzrA</i>                                                            | This Study          |
| RAM1811                                                                       | BTH101 pKT25- <i>mzrA</i> [D51A,I78F] and pUT18C- <i>mzrA</i>                                                         | This Study          |
| RAM1812                                                                       | BTH101 / pKT25- <i>mzrA</i> [D51A] and pUT18C- <i>envZ</i>                                                            | This Study          |
| RAM1813                                                                       | BTH101 / pKT25- <i>mzrA</i> [I78F] and pUT18C- <i>envZ</i>                                                            | This Study          |
| RAM1814                                                                       | BTH101 / pKT25- <i>mzrA</i> [D51A,I78F] and pUT18C- <i>envZ</i>                                                       | This Study          |
| RAM1815                                                                       | RAM1292 $\Delta$ <i>malE</i> ::Kan <sup>r</sup>                                                                       | This Study          |
| RAM1816                                                                       | RAM1815 / pMAL-p2x                                                                                                    | This Study          |
| RAM1817                                                                       | RAM1815 / pMAL-p2x- <i>mzrA</i> [ $\Delta$ TM]-FLAG                                                                   | This Study          |
| RAM1818                                                                       | RAM1815 / pMAL-p2x- <i>mzrA</i> [ $\Delta$ TM], [ $\Delta$ 105-127]-(FLAG)                                            | This Study          |
| <b>Plasmids</b>                                                               |                                                                                                                       |                     |
| pBAD24                                                                        | Amp <sup>r</sup> ; Expression vector; arabinose inducible                                                             | (16)                |
| pKT25                                                                         | Kan <sup>r</sup> ; Harbors the T25 fragment of adenylate cyclase from <i>B. pertussis</i>                             | Euromedex           |
| pUT18                                                                         | Amp <sup>r</sup> ; Harbors the T18 fragment of adenylate cyclase from <i>B. pertussis</i>                             | Euromedex           |
| pUT18C                                                                        | Amp <sup>r</sup> ; Harbors the T18 fragment of adenylate cyclase from <i>B. pertussis</i>                             | Euromedex           |
| pMAL-p2x                                                                      | Amp <sup>r</sup> ; Expression vector; IPTG inducible for periplasmic MalE fusion                                      | New England Biolabs |
| pBAD24 <i>mzrA</i> - <i>phoA</i>                                              | Amp <sup>r</sup> ; pBAD24 with the <i>mzrA</i> :: <i>phoA</i> gene fusion                                             | (13)                |
| pKT25 <i>mzrA</i>                                                             | Kan <sup>r</sup> ; pKT25 with the <i>mzrA</i> gene                                                                    | (13)                |
| pKT25 <i>envZ</i>                                                             | Kan <sup>r</sup> ; pKT25 with the <i>envZ</i> gene                                                                    | (13)                |
| pUT18C <i>mzrA</i>                                                            | Amp <sup>r</sup> ; pUT18C with the <i>mzrA</i> gene                                                                   | (13)                |
| pUT18C <i>envZ</i>                                                            | Amp <sup>r</sup> ; pUT18C with the <i>envZ</i> gene                                                                   | (13)                |
| pBAD24- <i>mzrA</i> [ $\Delta$ 105-127]-FLAG                                  | Amp <sup>r</sup> ; pBAD24 containing the <i>mzrA</i> [ $\Delta$ 105-127](FLAG) gene                                   | This Study          |
| pBAD24- <i>mzrA</i> [ $\Delta$ 73-127]-FLAG                                   | Amp <sup>r</sup> ; pBAD24 containing the <i>mzrA</i> [ $\Delta$ 73-127](FLAG) gene                                    | This Study          |
| pBAD24- <i>mzrA</i> [2-31]-FLAG                                               | Amp <sup>r</sup> ; pBAD24 containing the <i>mzrA</i> [ $\Delta$ 2-31](FLAG) gene                                      | This Study          |
| pBAD24- <i>mzrA</i> [13-28]-FLAG                                              | Amp <sup>r</sup> ; pBAD24 containing the <i>mzrA</i> [ $\Delta$ 13-28](FLAG) gene                                     | This Study          |
| pBAD24- <i>mzrA</i> [1-5]-FLAG                                                | Amp <sup>r</sup> ; pBAD24 containing the <i>mzrA</i> [ $\Delta$ 1-5](FLAG) gene                                       | This Study          |
| pBAD24- <i>mzrA</i> [TM]- <i>mzrA</i> [ $\Delta$ TM]-FLAG                     | Amp <sup>r</sup> ; pBAD24 containing the <i>mzrA</i> [TM]:: <i>mzrA</i> [ $\Delta$ TM](FLAG) gene                     | This Study          |
| pBAD24- <i>narX</i> [TM]- <i>mzrA</i> [ $\Delta$ TM]-FLAG                     | Amp <sup>r</sup> ; pBAD24 containing the <i>narX</i> [TM]:: <i>mzrA</i> [ $\Delta$ TM](FLAG) gene                     | This Study          |
| pBAD24- <i>phoA</i> [SS]- <i>mzrA</i> [ $\Delta$ TM]-FLAG                     | Amp <sup>r</sup> ; pBAD24 containing the <i>phoA</i> [SS]:: <i>mzrA</i> [ $\Delta$ TM](FLAG) gene                     | This Study          |
| pBAD24- <i>ompF</i> [SS]- <i>mzrA</i> [ $\Delta$ TM]-FLAG                     | Amp <sup>r</sup> ; pBAD24 containing the <i>ompF</i> [SS]:: <i>mzrA</i> [ $\Delta$ TM](FLAG) gene                     | This Study          |
| pBAD24- <i>ompF</i> [SS]- <i>mzrA</i> [ $\Delta$ TM],[ $\Delta$ 105-127]-FLAG | Amp <sup>r</sup> ; pBAD24 containing the <i>ompF</i> [SS]:: <i>mzrA</i> [ $\Delta$ TM],[ $\Delta$ 105-127](FLAG) gene | This Study          |
| pBAD24- <i>mzrA</i> [TM]                                                      | Amp <sup>r</sup> ; pBAD24 containing the <i>mzrA</i> [TM] gene fragment                                               | This Study          |
| pBAD24- <i>narX</i> [TM]                                                      | Amp <sup>r</sup> ; pBAD24 containing the <i>narX</i> [TM] gene fragment                                               | This Study          |
| pBAD24- <i>phoA</i> [SS]                                                      | Amp <sup>r</sup> ; pBAD24 containing the <i>phoA</i> [SS] gene fragment                                               | This Study          |
| pBAD24- <i>ompF</i> [SS]                                                      | Amp <sup>r</sup> ; pBAD24 containing the <i>ompF</i> [SS] gene fragment                                               | This Study          |
| pBAD24- <i>mzrA</i> [ $\Delta$ TM]-FLAG                                       | Amp <sup>r</sup> ; pBAD24 containing the <i>mzrA</i> [ $\Delta$ TM](FLAG)gene fragment                                | This Study          |
| pBAD24- <i>mzrA</i> [D51A]-FLAG                                               | Amp <sup>r</sup> ; pBAD24 containing the <i>mzrA</i> [D51A](FLAG) gene                                                | This Study          |
| pBAD24-                                                                       | Amp <sup>r</sup> ; pBAD24 containing the <i>mzrA</i> [K67A](FLAG) gene                                                | This Study          |

|                                                               |                                                                                     |            |
|---------------------------------------------------------------|-------------------------------------------------------------------------------------|------------|
| <i>mzrA</i> [K67A]-FLAG<br>pBAD24-<br><i>mzrA</i> [D74A]-FLAG | Amp <sup>r</sup> ; pBAD24 containing the <i>mzrA</i> [D74A](FLAG) gene              | This Study |
| pBAD24-<br><i>mzrA</i> [Q85A]-FLAG                            | Amp <sup>r</sup> ; pBAD24 containing the <i>mzrA</i> [Q85A](FLAG) gene              | This Study |
| pBAD24-<br><i>mzrA</i> [D51A]- <i>phoA</i>                    | Amp <sup>r</sup> ; pBAD24 with <i>mzrA</i> [D51A]:: <i>phoA</i> gene fusion         | This Study |
| pBAD24-<br><i>mzrA</i> [K67A]- <i>phoA</i>                    | Amp <sup>r</sup> ; pBAD24 with <i>mzrA</i> [K67A]:: <i>phoA</i> gene fusion         | This Study |
| pBAD24-<br><i>mzrA</i> [D74A]- <i>phoA</i>                    | Amp <sup>r</sup> ; pBAD24 with <i>mzrA</i> [D74A]:: <i>phoA</i> gene fusion         | This Study |
| pBAD24-<br><i>mzrA</i> [Q85A]- <i>phoA</i>                    | Amp <sup>r</sup> ; pBAD24 with <i>mzrA</i> [Q85A]:: <i>phoA</i> gene fusion         | This Study |
| pBAD24- <i>mzrA</i> [I78F]-<br><i>phoA</i>                    | Amp <sup>r</sup> ; pBAD24 with <i>mzrA</i> [I78F]:: <i>phoA</i> gene fusion         | This Study |
| pBAD24-<br><i>mzrA</i> [D51A,I78F]-<br><i>phoA</i>            | Amp <sup>r</sup> ; pBAD24 with <i>mzrA</i> [D51A, I78F]:: <i>phoA</i> gene fusion   | This Study |
| pKT25 <i>mzrA</i> [D51A]                                      | Kan <sup>r</sup> ; pKT25 with the <i>mzrA</i> [D51A] gene                           | This Study |
| pKT25 <i>mzrA</i> [I78F]                                      | Kan <sup>r</sup> ; pKT25 with the <i>mzrA</i> [I78F] gene                           | This Study |
| pKT25 <i>mzrA</i> [D51A,I78F]                                 | Kan <sup>r</sup> ; pKT25 with the <i>mzrA</i> [D51A, I78F] gene                     | This Study |
| pMAL-p2x-<br><i>mzrA</i> [ΔTM]-FLAG                           | Amp <sup>r</sup> ; pMAL-p2x containing the <i>mzrA</i> [ΔTM](FLAG) gene fragment    | This Study |
| pMAL-p2x-<br><i>mzrA</i> [ΔTM],[Δ105-127]-FLAG                | Amp <sup>r</sup> ; pMAL-p2x containing the <i>mzrA</i> [ΔTM], [Δ105-127](FLAG) gene | This Study |

---

<sup>a</sup> Numbered references are shown in the main text.

**Table S2.** Primers used for cloning and mutagenesis.

| Purpose                                                          | Sequence(5'-3') <sup>a</sup>                                               |
|------------------------------------------------------------------|----------------------------------------------------------------------------|
| <b>For cloning</b>                                               |                                                                            |
| <i>mzrA</i> EcoRI Fwd                                            | AGGAGgaattcACCATGCAAATACCTCGC                                              |
| <i>mzrA</i> -FLAG <i>Hind</i> III Rev                            | CGATCaagcttACTTATCGTCGTCGTCCTTGTAGTCACCGAAGCGATGAG<br>AGTTATC              |
| <i>mzrA</i> <i>Bsp</i> HI Fwd 2 <sup>nd</sup> met( $\Delta$ 1-5) | AGGAGtcatgaCGCTTCGCCAGCTAGCC                                               |
| <i>mzrA</i> $\Delta$ 31( $\Delta$ 2-31) Fwd <i>Eco</i> RI        | AGGAGgaattcACCATGCGCCAGCAAGAGTCTACGC                                       |
| <i>mzrA</i> <i>Xba</i> I Fwd- $\Delta$ TM                        | TGCAtctagaCAaCAAGAGTCgACGCTGGCGATTCTGTCGGC                                 |
| <i>mzrA</i> TM <i>Xba</i> I Rev for fusion                       | TGCAtctagaAACCGCGGACCAGGCCAGCAAC                                           |
| <i>mzrA</i> $\Delta$ C23-Flag <i>Hind</i> III                    | CGATCaagcttACTTATCGTCGTCGTCCTTGTAGTCCGCAATGATGTAGCC<br>ATGGGG              |
| <i>mzrA</i> $\Delta$ C55-Flag <i>Hind</i> III                    | CGATCaagcttACTTATCGTCGTCGTCCTTGTAGTCTTTGGGGGTGATACT<br>TTTGAAAGG           |
| <i>narX</i> TM1 <i>Xba</i> I Rev-for Fusion                      | TGCAtctagaCACCAGCCAGCCAGAAACCGCC                                           |
| <i>narX</i> Fwd <i>Eco</i> RI                                    | AGGAGgaattcAccATGCTTAAACGTTGTCTCTCTCCGC                                    |
| <i>phoA</i> <i>Eco</i> RI Fwd                                    | AGGAGgaattcAccATGAAACAAAGCACTATTGCAC                                       |
| <i>phoA</i> -SS <i>Xba</i> I Rev-for Fusion                      | TGCAtctagaGGCTTTTGTTCACAGGGGTAAAC                                          |
| <i>ompF</i> -SS <i>Xba</i> I Rev-for fusion                      | TGCAtctagaAGCGTTTGCAGTACCTGCTACTAACAG                                      |
| <i>ompF</i> Fwd <i>Bsp</i> HI                                    | GGCATtcatgaTGAAGCGCAATATTCTGGC                                             |
| <b>For mutagenesis</b>                                           |                                                                            |
| <i>mzrA</i> $\Delta$ 13-28 SDM Fwd                               | CGCATGTCGCTTCGCCAGCTAGCCTCCGCGGTTTCGCCAGCAAGAGTC                           |
| <i>mzrA</i> $\Delta$ 13-28 SDM Rev                               | GACTCTTGCTGGCGAACCAGCGGAGGCTAGCTGGCGAAGCGACATGCG                           |
| <i>mzrA</i> D51A SDM Fwd                                         | CGTGCCGTTTCATCAAGGAcACAACGATGCCgGcCGGTTTTCAATCTGGC<br>AcCACCTTGACGCTCATGGC |
| <i>mzrA</i> D51A SDM Rev                                         | GCCATGAGCGTCAAGGTGgTGCCAGATTGAAAAACcGgCCGGCATCGT<br>TGTtCCTTGATGAACGGCACG  |
| <i>mzrA</i> K67A SDM Fwd                                         | CTTGACGCTCATGGCATTTCCTTTCgcAAGTATCACCCCCAAAAAC                             |
| <i>mzrA</i> K67A SDM Rev                                         | GTTTTTGGGGGTGATACTTgcGAAAGGAATGCCATGAGCGTCAAG                              |
| <i>mzrA</i> D74A SDM Fwd                                         | GTATCACCCCCAAAAACGcCACTCTGTTAATTACATTTGACTCCAGC                            |
| <i>mzrA</i> D74A SDM Rev                                         | GCTGGAGTCAAATGTAATTAACAGAGTGgCGTTTTTGGGGGTGATAC                            |
| <i>mzrA</i> Q85A SDM Fwd                                         | CTGTTAATTACATTTGACTCCAGCGACgcGAGCGCaGCaGCAAAAGCGG<br>TCCTCGACAG            |
| <i>mzrA</i> Q85A SDM Rev                                         | CTGTCGAGGACCGCTTTTGCtGcTGCgCTCgcGTCGCTGGAGTCAAATGT<br>AATTAACAG            |
| <i>mzrA</i> mutagenesis Fwd                                      | CGCCAGCAAGAGTCTACGC                                                        |
| <i>mzrA</i> mutagenesis Rev                                      | CGCAATGATGTAGCCATGGG                                                       |
| <i>mzrA</i> I78F SDM Fwd                                         | GTATCACCCCCAAAAACGACACTCTGTTAfTTACATTTGACTCCAGCGA<br>CCAGAGCGCCG           |
| <i>mzrA</i> I78F SDM Rev                                         | CGGCGCTCTGGTTCGCTGGAGTCAAATGTAAATAACAGAGTGTCGTTTT<br>TGGGGGTGATAC          |

<sup>a</sup> Restriction and mutagenesis sites are shown by lower case. Rev and Fwd mean reverse and forward primers, respectively.
